# Supplementary material
Source: Springer Nature journal article supplement (https://www.springermedizin.de/resource/supplementary/13041_2009_75_MOESM1_ESM.pdf/25657466)
Supplement: MOESM1 [file 25657466]

# Adrenergic receptors

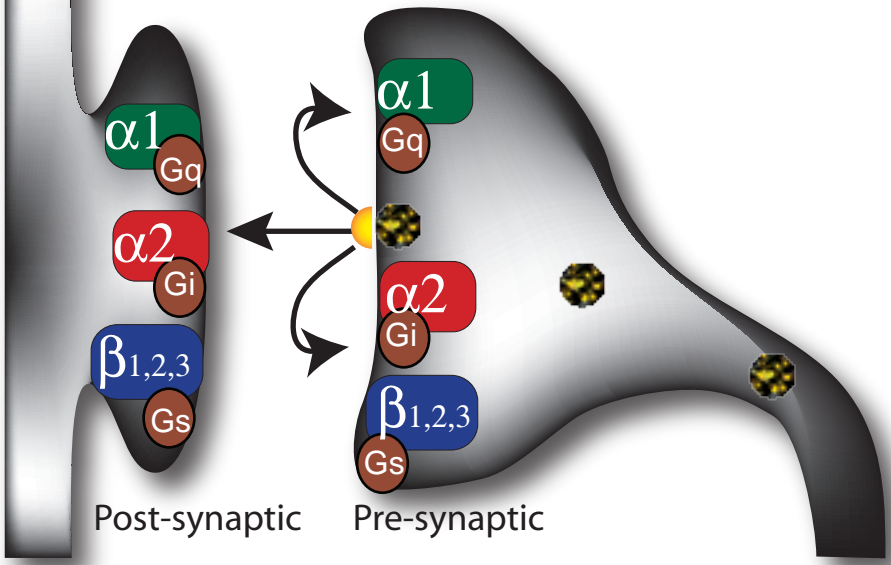

Post-synaptic

Pre-synaptic

Locus  
Coeruleus

vesicular monoamine  
transporter

Norepinephrine

dopamine  
 $\beta$ -hydroxylase

Dopamine
